# Supplementary material for: Identification of potential crucial genes and pathways associated with vein graft restenosis based on gene expression analysis in experimental rabbits
Source: PeerJ. 2018 May 16;6:e4704. doi: 10.7717/peerj.4704 (PMC5960261; doi:10.7717/peerj.4704)
Supplement: Supplemental Information 3 [file peerj-06-4704-s003.xlsx]

## Sheet: DEGs_KEGG
Category	Term	Count	%	PValue	Genes	List Total	Pop Hits	Pop Total	Fold Enrichment	Bonferroni	Benjamini
KEGG_PATHWAY	ocu05323:Rheumatoid arthritis	37	0.0143994	5.89721e-14	CSF2, LOC100008716, TNF, CCL2, IL18, TLR2, ACP5, CXCL8, TLR4, ATP6V1B2, IL15, LOC100009097, MMP3, ATP6V0B, MMP1, TGFB2, ATP6V0C, FOS, LOC100008830, IFNG, LOC100350168, IL1B, ATP6V0D1, ATP6V0D2, LTB, IL1A, IL6, LOC100348776, ATP6V1D, ATP6V1F, ATP6V1C1, ATP6V1A, TNFSF13B, CD80, RLA-DRB1, ATP6V0A1, LOC100343144	720	93	7383	4.07961	1.66247e-11	1.66247e-11
KEGG_PATHWAY	ocu04640:Hematopoietic cell lineage	26	0.0101185	3.91929e-08	CSF2, IL1R2, TNF, MME, IL7R, LOC100351865, LOC100009097, GP5, CD2, MS4A1, IL1B, CD5, IL1A, IL4, IL6, CD3G, CD3E, ITGA2, CD1B, CD1E, CD1D, CD36, ITGA6, TFRC, CD59, EPOR	720	78	7383	3.41806	1.10523e-05	5.52619e-06
KEGG_PATHWAY	ocu04145:Phagosome	39	0.0151777	5.11679e-08	RAB7A, MSR1, C3, TLR2, TLR4, ATP6V1B2, LOC100009097, LOC100351865, CANX, ATP6V0B, ATP6V0C, MARCO, LOC100008830, TAP1, LOC100350168, SCARB1, ATP6V0D1, ATP6V0D2, THBS2, THBS3, LOC100349757, MRC1, OLR1, NCF1, ITGA2, CTSS, ATP6V1D, M6PR, ATP6V1F, ATP6V1C1, ATP6V1A, CORO1A, CYBB, CD36, TFRC, RLA-DRB1, ATP6V0A1, LOC100343144, CLEC7A	720	155	7383	2.58008	1.44292e-05	4.80977e-06
KEGG_PATHWAY	ocu04142:Lysosome	32	0.0124535	1.6783e-07	LGMN, HEXB, ACP5, CLTC, ATP6V0B, ASAH1, ATP6V0C, CD68, LOC100008830, LAPTM5, AP3M2, GNPTAB, TPP1, NAGA, ATP6V0D1, ATP6V0D2, LAPTM4B, CLN3, CTSZ, LIPA, GUSB, CTSS, M6PR, MANBA, GNS, NPC2, IGF2R, ATP6V0A1, CTSC, CTSB, CTSH, CLN5	720	118	7383	2.78079	4.7327e-05	1.1832e-05
KEGG_PATHWAY	ocu05142:Chagas disease (American trypanosomiasis)	28	0.0108968	3.61468e-06	CCL2, TNF, C3, GNAI1, TLR2, CXCL8, TLR4, C1QC, TGFB2, FOS, ACE, IFNG, IL1B, FAS, PPP2R2B, PLCB2, IFNGR2, PIK3R1, PIK3CG, IL6, CD3G, CD3E, TGFBR1, LOC100348776, C1QB, MAPK14, IL12B	720	109	7383	2.6341	0.00101882	0.000203848
KEGG_PATHWAY	ocu04060:Cytokine-cytokine receptor interaction	45	0.0175127	3.75109e-06	CSF2, TNFRSF21, IL1R2, TNF, CCL2, IL18, CCR1, CXCL8, IL15, IL7R, CCL4, IL17RA, CXCL10, TGFB2, TNFRSF11B, CCL21, CXCR4, IFNG, IL1B, FAS, XCR1, LTB, IFNGR2, IL1A, GHR, IL4, EGFR, IL18R1, IL6, TNFSF4, LTBR, TGFBR1, LOC100348776, ACKR3, LOC100008826, VEGFC, CCR8, TNFSF10, LOC100008921, TNFSF13B, PRLR, CCR2, EPOR, IL12B, BMPR1B	720	224	7383	2.05999	0.00105725	0.000176286
KEGG_PATHWAY	ocu05146:Amoebiasis	27	0.0105076	1.14121e-05	IL1R2, RAB7A, CSF2, TNF, TLR2, CXCL8, COL2A1, TLR4, LOC100351865, LOC100009097, TGFB2, IFNG, IL1B, PLCB2, PIK3R1, PIK3CG, IL6, COL4A2, COL5A3, COL5A2, PRKCB, COL4A5, SERPINB6, SERPINB8, SERPINB2, COL1A1, IL12B	720	109	7383	2.54002	0.00321306	0.000459642
KEGG_PATHWAY	ocu05140:Leishmaniasis	21	0.00817261	2.55408e-05	IL4, TNF, PTGS2, NCF1, C3, MARCKSL1, TLR2, TLR4, LOC100351865, LOC100009097, TGFB2, FOS, RLA-DRB1, MAPK14, IFNG, LOC100350168, IL1B, IL12B, LOC100343144, IFNGR2, IL1A	720	76	7383	2.83339	0.00717672	0.00089992
KEGG_PATHWAY	ocu05133:Pertussis	20	0.00778343	4.78499e-05	LOC100008716, IL6, TNF, GNAI1, LY96, C3, CXCL8, TLR4, LOC100351865, C1QC, FOS, C1QB, MAPK14, IRF8, IL1B, IL12B, C2, CASP1, IL1A	720	73	7383	2.80936	0.0134033	0.00149821
KEGG_PATHWAY	ocu05143:African trypanosomiasis	12	0.00467006	9.45028e-05	VCAM1, IL6, TNF, IL18, IFNG, IDO2, IL1B, FAS, IL12B, LOC100009097, PLCB2, PRKCB	720	31	7383	3.96935	0.026299	0.00266156
KEGG_PATHWAY	ocu04668:TNF signaling pathway	23	0.00895095	0.000164302	PIK3CG, CSF2, IL18R1, IL6, CCL2, TNF, PTGS2, MMP9, CREB1, IL15, MMP3, BIRC3, CXCL10, VCAM1, FOS, NOD2, MAPK14, GRO-A, IL1B, CREB3L1, FAS, PIK3R1, TRAF3	720	99	7383	2.38228	0.0452798	0.00420359
KEGG_PATHWAY	ocu05132:Salmonella infection	20	0.00778343	0.000181065	CSF2, RAB7A, IL6, ROCK1, IL18, CXCL8, LOC100348776, TLR4, CCL4, ARPC1A, FOS, PFN4, ARPC2, MAPK14, IFNG, GRO-A, IL1B, CASP1, IFNGR2, IL1A	720	80	7383	2.56354	0.0497831	0.00424637
KEGG_PATHWAY	ocu05152:Tuberculosis	35	0.013621	0.000187819	RAB7A, TNF, C3, CAMK2G, IL18, TLR2, TLR4, LOC100009097, LOC100351865, ATP6V0B, TGFB2, ATP6V0C, NOD2, CLEC4E, IFNG, LOC100350168, IL1B, LOC100341053, ATP6V0D1, ATP6V0D2, IFNGR2, IL1A, MRC1, IL6, CREB1, CAMP, CTSS, CORO1A, RLA-DRB1, MAPK14, ATP6V0A1, RIPK2, CLEC7A, IL12B, LOC100343144	720	185	7383	1.93998	0.0515915	0.00406632
KEGG_PATHWAY	ocu05321:Inflammatory bowel disease (IBD)	18	0.00700509	0.000202429	IL4, IL18R1, IL6, TNF, IL18, TLR2, TLR4, RORA, TGFB2, NOD2, RLA-DRB1, IFNG, LOC100350168, IL1B, IL12B, LOC100343144, IFNGR2, IL1A	720	68	7383	2.71434	0.0554917	0.00406961
KEGG_PATHWAY	ocu05410:Hypertrophic cardiomyopathy (HCM)	21	0.00817261	0.000233999	IL6, TNF, MYL3, CACNB1, CACNB2, ITGA2, CACNB3, TPM2, TTN, TPM4, TGFB2, ACE, DES, ITGA6, SGCG, ITGB8, ITGB7, RYR2, SGCD, LOC100349893, SGCA	720	88	7383	2.44702	0.0638648	0.00439003
KEGG_PATHWAY	ocu04064:NF-kappa B signaling pathway	19	0.00739426	0.000539418	TNF, LTBR, PTGS2, XIAP, LY96, BCL2A1, CXCL8, TLR4, LOC100009097, BIRC3, CCL4, VCAM1, TNFSF13B, CCL21, PLCG2, IL1B, LTB, PLAU, TRAF3	720	80	7383	2.43536	0.141146	0.00946473
KEGG_PATHWAY	ocu05414:Dilated cardiomyopathy	21	0.00817261	0.000587109	TNF, MYL3, CACNB1, ITGA2, CACNB2, CACNB3, LOC100009097, TPM2, TTN, TPM4, TGFB2, DES, ITGA6, SGCG, ITGB8, PLN, ITGB7, RYR2, SGCD, LOC100349893, SGCA	720	94	7383	2.29082	0.152626	0.00969466
KEGG_PATHWAY	ocu05200:Pathways in cancer	61	0.0237395	0.000646798	FGF7, PTGS2, MMP9, PPARG, STAT5B, FGF10, FGF12, MMP1, TGFB2, CCNE2, AGTR1, CCNE1, EDNRB, FOS, CXCR4, FAS, PLCB2, MYC, FGF2, PIK3CG, EGFR, PTGER2, PTGER3, BCR, ROCK1, PTGER4, RUNX1T1, RB1, MECOM, RAD51, PRKCB, JUP, VEGFC, HIF1A, NCOA4, LOC100349893, PIAS2, GNB4, FGFR1, WNT5B, XIAP, GNAI1, EGLN3, CXCL8, BDKRB1, RASGRP3, RASGRP1, PIK3R1, TRAF3, BMP4, COL4A2, BMP2, IL6, TGFBR1, ITGA2, BIRC3, FZD4, CO…	720	408	7383	1.5331	0.166779	0.0100852
KEGG_PATHWAY	ocu04966:Collecting duct acid secretion	10	0.00389172	0.000699551	ATP6V0C, ATP6V1C1, ATP6V1A, SLC12A7, ATP6V0A1, ATP6V1B2, ATP6V0D1, ATP6V1D, ATP6V0D2, ATP6V1F	720	27	7383	3.79784	0.179091	0.0103327
KEGG_PATHWAY	ocu01100:Metabolic pathways	161	0.0626566	0.000708534	LDHA, ALAD, GNPDA1, TUSC3, SGMS2, PTGS2, HMGCR, CNDP2, PGD, PTGS1, ADH1A, SGMS1, ACSS2, NMRK1, GPAT3, PNP, DSE, MTHFD1L, CYP2C, ST3GAL2, ST3GAL5, TRAK2, B3GALNT1, RPN1, RGN, LOC100340292, HADH, NANP, NMNAT2, SLC33A1, BST1, POLE, PISD, LPCAT2, GNS, CD38, RFK, ABAT, MGAT5, PLA2G2D, PRPS1, XDH, LALBA, ME3, GNE, ENPP3, ALDOB, ACSBG2, CERS6, HMGCS1, CERS4, KMO, ATP6V1B2, ATP6V0B, PPAT, ATP6V0C, LOC100…	720	1312	7383	1.25832	0.181169	0.0099441
KEGG_PATHWAY	ocu05332:Graft-versus-host disease	12	0.00467006	0.000711846	IL6, TNF, CD80, RLA-DRB1, LOC100101600, IFNG, LOC100350168, IL1B, FAS, LOC100343144, IL1A, LOC100349757	720	38	7383	3.23816	0.181934	0.0095169
KEGG_PATHWAY	ocu04721:Synaptic vesicle cycle	16	0.00622675	0.000824857	STX2, ATP6V1B2, CLTC, ATP6V1D, ATP6V0B, ATP6V1F, ATP6V0C, ATP6V1C1, ATP6V1A, SLC17A8, AP2B1, ATP6V0A1, ATP6V0D1, ATP6V0D2, CACNA1A, AP2M1	720	63	7383	2.60423	0.207613	0.0105218
KEGG_PATHWAY	ocu05144:Malaria	14	0.0054484	0.000915525	IL6, CCL2, TNF, IL18, TLR2, CXCL8, TLR4, TGFB2, VCAM1, CD36, IFNG, IL1B, THBS2, THBS3	720	51	7383	2.81487	0.227634	0.0111674
KEGG_PATHWAY	ocu04672:Intestinal immune network for IgA production	14	0.0054484	0.00162029	IL4, IL6, LTBR, PIGR, IL15, LOC100009097, TNFSF13B, CD80, RLA-DRB1, CXCR4, ICOS, ITGB7, LOC100350168, LOC100343144	720	54	7383	2.65849	0.367005	0.0188735
KEGG_PATHWAY	ocu05205:Proteoglycans in cancer	34	0.0132318	0.00180336	FGFR1, CAV2, TNF, WNT5B, MRAS, CAMK2G, MMP9, TLR2, VTN, TLR4, TIMP3, HOXD10, TGFB2, LOC100008830, EZR, HPSE, MSN, FAS, FGF2, MYC, THBS2, PIK3R1, EGFR, PIK3CG, ROCK1, HCLS1, ITGA2, FZD4, PRKCB, HIF1A, MAPK14, PLCG2, IL12B, PLAU	720	201	7383	1.73454	0.398907	0.0201543
KEGG_PATHWAY	ocu00670:One carbon pool by folate	8	0.00311337	0.0020122	MTHFD1, MTHFS, MTHFD2, TYMS, SHMT2, ALDH1L2, MTHFD1L, GART	720	20	7383	4.10167	0.433348	0.0216097
KEGG_PATHWAY	ocu05330:Allograft rejection	12	0.00467006	0.00216735	IL4, TNF, CD80, RLA-DRB1, LOC100101600, IFNG, LOC100350168, FAS, LOC100343144, IL12B, LOC100009097, LOC100349757	720	43	7383	2.86163	0.457657	0.0224065
KEGG_PATHWAY	ocu04940:Type I diabetes mellitus	13	0.00505923	0.00249117	TNF, CD80, RLA-DRB1, LOC100101600, IFNG, LOC100343425, LOC100350168, IL1B, FAS, LOC100343144, IL12B, IL1A, LOC100349757	720	50	7383	2.66608	0.505094	0.0248081
KEGG_PATHWAY	ocu04110:Cell cycle	24	0.00934012	0.00297619	CDC6, CDK1, RBL2, ANAPC5, TTK, CHEK1, RB1, YWHAE, MCM4, TGFB2, MCM6, CCNE2, CCNE1, YWHAG, CCNB2, MCM7, MAD2L1, PCNA, BUB1B, ORC6, CCNA2, MYC, GADD45A, BUB3	720	129	7383	1.90775	0.568521	0.028568
KEGG_PATHWAY	ocu04620:Toll-like receptor signaling pathway	18	0.00700509	0.00550063	PIK3CG, IL6, TNF, LY96, TLR2, CXCL8, LOC100348776, TLR4, CCL4, CXCL10, FOS, IKBKE, CD80, MAPK14, IL1B, IL12B, PIK3R1, TRAF3	720	90	7383	2.05083	0.788908	0.0505275
KEGG_PATHWAY	ocu05162:Measles	23	0.00895095	0.00571602	PIK3CG, IL4, IL6, CD3G, CD3E, STAT5B, TLR2, TLR4, LOC100009097, CCNE2, CCNE1, IKBKE, TNFSF10, SH2D1A, EIF3H, IFNG, IL1B, MSN, FAS, IL12B, IFNGR2, PIK3R1, IL1A	720	128	7383	1.84255	0.801416	0.0508103
KEGG_PATHWAY	ocu05222:Small cell lung cancer	17	0.00661592	0.00720439	PIK3CG, FHIT, COL4A2, PTGS2, XIAP, ITGA2, RB1, BIRC3, COL4A5, CCNE2, CCNE1, ITGA6, CKS2, PIAS2, MYC, PIK3R1, TRAF3	720	85	7383	2.05083	0.86984	0.0617309
KEGG_PATHWAY	ocu04151:PI3K-Akt signaling pathway	46	0.0179019	0.0073921	FGFR1, FGF7, EFNA1, LOC100343709, TLR2, FGF10, VTN, TLR4, COL2A1, FGF12, LOC100009097, IL7R, CCNE2, CCNE1, ITGB8, ITGB7, CREB3L1, PDGFC, MTCP1, PPP2R2B, THBS2, MYC, FGF2, ANGPT2, PIK3R1, THBS3, GHR, PIK3CG, EGFR, IL4, COL4A2, IL6, RBL2, CREB1, ITGA2, COL5A3, YWHAE, COL5A2, COL4A5, VEGFC, YWHAG, PRLR, ITGA6, EPOR, GNB4, COL1A1	720	321	7383	1.46944	0.876599	0.0614353
KEGG_PATHWAY	ocu05150:Staphylococcus aureus infection	12	0.00467006	0.00751257	C3AR1, C1QB, RLA-DRB1, C3, LOC100350168, FPR1, C2, LOC100343144, LOC100351865, LOC100009097, C1QC	720	50	7383	2.461	0.880751	0.0606296
KEGG_PATHWAY	ocu05161:Hepatitis B	25	0.00972929	0.00839054	PIK3CG, IL6, TNF, TGFBR1, CREB1, MMP9, STAT5B, TLR2, CXCL8, TLR4, RB1, TGFB2, PRKCB, CCNE2, FOS, IKBKE, CCNE1, MAP3K1, DDB2, PCNA, CREB3L1, FAS, MYC, CCNA2, PIK3R1	720	148	7383	1.73212	0.907089	0.0656358
KEGG_PATHWAY	ocu05134:Legionellosis	14	0.0054484	0.00885103	IL6, TNF, C3, IL18, TLR2, CXCL8, TLR4, LOC100351865, RAB1A, HSF1, IL1B, GRO-A, IL12B, CASP1	720	65	7383	2.20859	0.918496	0.0672721
KEGG_PATHWAY	ocu04062:Chemokine signaling pathway	27	0.0105076	0.0105559	LOC100008716, CCL2, GNAI1, CCR1, STAT5B, CXCL8, CCL4, CXCL10, CCL21, CXCR4, XCR1, PLCB2, PIK3R1, SHC4, PIK3CG, VAV3, ROCK1, NCF1, HCK, LOC100348776, CCR8, LOC100008921, CCR2, GRO-A, GRK4, GNB4, LOC100349255	720	167	7383	1.65786	0.949843	0.0776965
KEGG_PATHWAY	ocu04611:Platelet activation	22	0.00856178	0.0106106	PIK3CG, ROCK1, GNAI1, MYLK3, PTGS1, PRKCI, ITGA2, COL2A1, PRKG1, COL5A3, COL5A2, GP5, MAPK14, RASGRP1, PLCG2, GUCY1A2, GUCY1B3, COL1A1, PLCB2, PIK3R1, MYLK, LCP2	720	127	7383	1.77631	0.950619	0.0761106
KEGG_PATHWAY	ocu04612:Antigen processing and presentation	14	0.0054484	0.0114176	TNF, PDIA3, LGMN, CREB1, CTSS, CANX, LOC100008830, RLA-DRB1, IFNG, TAP1, LOC100350168, LOC100343144, CTSB, LOC100349757	720	67	7383	2.14266	0.960769	0.0796793
KEGG_PATHWAY	ocu04066:HIF-1 signaling pathway	18	0.00700509	0.0117013	EGFR, PIK3CG, TF, IL6, LTBR, CAMK2G, EGLN3, HK1, TLR4, PRKCB, CYBB, HIF1A, TFRC, PLCG2, IFNG, IFNGR2, ANGPT2, PIK3R1	720	97	7383	1.90284	0.963819	0.0796309
KEGG_PATHWAY	ocu04923:Regulation of lipolysis in adipocytes	12	0.00467006	0.0117303	PIK3CG, CGA, PLA2G16, PTGER3, PTGS2, NPY, GNAI1, PTGS1, FABP4, NPY1R, PRKG1, PIK3R1	720	53	7383	2.3217	0.964117	0.0779524
KEGG_PATHWAY	ocu04614:Renin-angiotensin system	7	0.0027242	0.0126414	AGTR1, AGTR2, ACE, ATP6AP2, ACE2, MME, NLN	720	21	7383	3.41806	0.972335	0.0818725
KEGG_PATHWAY	ocu05166:HTLV-I infection	38	0.0147885	0.0127647	CSF2, IL1R2, TNF, WNT5B, XIAP, MRAS, STAT5B, CHEK1, MYBL1, IL15, CANX, TGFB2, VCAM1, FOS, MAP3K1, LOC100350168, MYC, PIK3R1, BUB3, LOC100349757, PIK3CG, IL6, CD3G, LTBR, ANAPC5, CD3E, CREB1, TGFBR1, POLE, RB1, FZD4, POLD3, ATF3, MAD2L1, RLA-DRB1, PCNA, BUB1B, LOC100343144	720	262	7383	1.48725	0.973293	0.0808
KEGG_PATHWAY	ocu04261:Adrenergic signaling in cardiomyocytes	24	0.00934012	0.0147245	PIK3CG, MYL3, GNAI1, CAMK2G, CREB1, CACNB1, CACNB2, ATP1A4, CACNB3, ATP1A2, TPM2, TPM4, ATP2B1, AGTR1, AGTR2, PLN, PPP1R1A, MAPK14, RYR2, CREB3L1, LOC100349893, PPP2R2B, PLCB2, PIK3R1	720	147	7383	1.67415	0.98475	0.0906926
KEGG_PATHWAY	ocu04621:NOD-like receptor signaling pathway	11	0.00428089	0.015503	IL6, NOD2, CCL2, TNF, IL18, MAPK14, CXCL8, RIPK2, IL1B, BIRC3, CASP1	720	48	7383	2.34991	0.987797	0.0932725
KEGG_PATHWAY	ocu00564:Glycerophospholipid metabolism	17	0.00661592	0.0167979	GPD2, PLA2G16, LPGAT1, LOC100343913, LYPLA1, PISD, LPCAT2, PLPP1, GPAT3, LPCAT3, PLPP3, CEPT1, PCYT1A, GPAM, PLA2G2D, SELENOI	720	93	7383	1.87442	0.991581	0.0986424
KEGG_PATHWAY	ocu04512:ECM-receptor interaction	16	0.00622675	0.0198421	LOC100355470, COL4A2, ITGA2, VTN, COL2A1, COL5A3, COL5A2, COL4A5, GP5, CD36, ITGA6, ITGB8, ITGB7, COL1A1, THBS2, THBS3	720	87	7383	1.88582	0.996489	0.113301
KEGG_PATHWAY	ocu04514:Cell adhesion molecules (CAMs)	23	0.00895095	0.0201395	PTPRM, CADM1, SELL, NECTIN1, NLGN1, NECTIN2, LOC100351865, ALCAM, VCAM1, ITGA6, CD80, RLA-DRB1, ITGB8, ICOS, ITGB7, CD274, LOC100350168, CD2, VCAN, LOC100343144, JAM2, CD226, LOC100349757	720	143	7383	1.64927	0.996777	0.11266
KEGG_PATHWAY	ocu05412:Arrhythmogenic right ventricular cardiomyopathy (ARVC)	14	0.0054484	0.0226392	CACNB1, GJA1, ITGA2, CACNB2, CACNB3, JUP, DES, SGCG, ITGA6, ITGB8, ITGB7, RYR2, SGCD, SGCA	720	73	7383	1.96655	0.998431	0.123473
KEGG_PATHWAY	ocu04510:Focal adhesion	30	0.0116752	0.024974	CAV2, XIAP, COL2A1, VTN, MYL9, PAK2, ITGB8, ITGB7, PDGFC, THBS2, PIK3R1, THBS3, SHC4, EGFR, PIK3CG, COL4A2, VAV3, ROCK1, MYLK3, ITGA2, CAPN2, BIRC3, COL5A3, COL5A2, PRKCB, COL4A5, VEGFC, ITGA6, COL1A1, MYLK	720	205	7383	1.50061	0.999201	0.132936
KEGG_PATHWAY	ocu00480:Glutathione metabolism	12	0.00467006	0.0252876	LOC100341622, GSTM2, ODC1, G6PD, GGCT, LOC100349830, RRM2, PGD, GPX3, IDH1, GPX8, MGST1	720	59	7383	2.08559	0.99927	0.132052
KEGG_PATHWAY	ocu00071:Fatty acid degradation	11	0.00428089	0.0263768	LOC100350716, ECI2, GCDH, ALDH7A1, ACSBG2, ECHS1, ADH1A, HADH, ACSL4, ACSL6, ALDH3A2	720	52	7383	2.16915	0.999468	0.134946
KEGG_PATHWAY	ocu05020:Prion diseases	8	0.00311337	0.031298	C7, C1QB, IL6, IL1B, HSPA5, C1QC, IL1A	720	32	7383	2.56354	0.999872	0.155652
KEGG_PATHWAY	ocu00100:Steroid biosynthesis	6	0.00233503	0.0316379	SOAT1, EBP, LIPA, SQLE, LOC100341053, LOC100355623	720	19	7383	3.23816	0.999884	0.154553
KEGG_PATHWAY	ocu04650:Natural killer cell mediated cytotoxicity	17	0.00661592	0.0341293	PIK3CG, CSF2, CD244, VAV3, TNF, LOC100101600, LOC100009097, PRKCB, SH2D1A, TNFSF10, PLCG2, IFNG, FAS, IFNGR2, PIK3R1, SHC4, LCP2	720	101	7383	1.72595	0.999944	0.163096
KEGG_PATHWAY	ocu03030:DNA replication	8	0.00311337	0.036509	POLD3, MCM7, SSBP1, POLE, PCNA, MCM4, RPA3, MCM6	720	33	7383	2.48586	0.999972	0.170796
KEGG_PATHWAY	ocu04623:Cytosolic DNA-sensing pathway	10	0.00389172	0.044492	IKBKE, IL6, TMEM173, IL18, IL1B, POLR3GL, CASP1, CCL4, POLR3E, CXCL10	720	49	7383	2.09269	0.999997	0.201616
KEGG_PATHWAY	ocu04022:cGMP-PKG signaling pathway	25	0.00972929	0.0446177	ADORA3, GNAI1, MRVI1, PRKG1, MYL9, ATP2B1, EDNRB, AGTR1, GUCY1A2, CREB3L1, PLCB2, PIK3R1, PIK3CG, ROCK1, CREB1, MYLK3, ATP1A4, ATP1A2, KCNJ8, ATP2A3, PLN, PDE5A, ATP2A1, GUCY1B3, MYLK	720	172	7383	1.49043	0.999997	0.199023
KEGG_PATHWAY	ocu05310:Asthma	7	0.0027242	0.0490473	IL4, TNF, RLA-DRB1, LOC100350168, MS4A2, LOC100343144, LOC100009097	720	28	7383	2.56354	0.999999	0.213666
KEGG_PATHWAY	ocu04666:Fc gamma R-mediated phagocytosis	14	0.0054484	0.0524526	ARPC1A, PIK3CG, VAV3, MARCKSL1, ARPC2, NCF1, HCK, PLCG2, LOC100009097, PLPP1, PRKCD, PIK3R1, PLPP3, PRKCB	720	82	7383	1.75071	1	0.223709
KEGG_PATHWAY	ocu05202:Transcriptional misregulation in cancer	23	0.00895095	0.057051	CSF2, IL1R2, IL6, LOC100101600, MMP9, BCL2A1, PPARG, RUNX1T1, CXCL8, LOC100351865, LOC100009097, MMP3, MLF1, JUP, PROM1, REL, ITGB7, ETV1, ETV6, PBX3, MYC, HPGD, PLAU	720	159	7383	1.48331	1	0.237815
KEGG_PATHWAY	ocu04010:MAPK signaling pathway	33	0.0128427	0.0588202	IL1R2, FGFR1, TNF, FGF7, MRAS, MAPKAPK3, CACNB1, DUSP10, CACNB2, FGF10, CACNB3, FGF12, TGFB2, FOS, MAP3K6, RASGRP3, PAK2, RASGRP1, MAP3K1, IL1B, FAS, FGF2, MYC, IL1A, RASA2, EGFR, TGFBR1, MECOM, PRKCB, DUSP1, MAPK14, GADD45A, CACNA1A	720	248	7383	1.36447	1	0.240981
KEGG_PATHWAY	ocu04380:Osteoclast differentiation	20	0.00778343	0.0600001	PIK3CG, TNF, NCF1, TGFBR1, CREB1, PPARG, ACP5, LOC100347041, TGFB2, FOS, CYBB, TNFRSF11B, MAPK14, PLCG2, IFNG, IL1B, IFNGR2, PIK3R1, IL1A, LCP2	720	134	7383	1.53047	1	0.24192
KEGG_PATHWAY	ocu04670:Leukocyte transendothelial migration	18	0.00700509	0.0600987	PIK3CG, VAV3, ROCK1, GNAI1, NCF1, MMP9, LOC100351865, MYL9, PRKCB, VCAM1, CYBB, EZR, CXCR4, MAPK14, PLCG2, MSN, JAM2, PIK3R1	720	117	7383	1.57756	1	0.238984
KEGG_PATHWAY	ocu04146:Peroxisome	15	0.00583758	0.0605336	XDH, ACOX2, ECI2, HACL1, LOC100338511, HMGCLL1, LOC100349830, PIPOX, FAR1, IDH1, ABCD4, ACSL4, SLC27A2, ACSL6	720	92	7383	1.67188	1	0.237313
KEGG_PATHWAY	ocu05164:Influenza A	24	0.00934012	0.0612965	PIK3CG, PABPN1, IL6, CCL2, TNF, IL18, CXCL8, TLR4, CXCL10, IKBKE, TNFSF10, RLA-DRB1, PRSS2, MAPK14, IFNG, LOC100350168, IL1B, FAS, IL12B, LOC100343144, CASP1, IFNGR2, PIK3R1, IL1A	720	169	7383	1.45621	1	0.23683
KEGG_PATHWAY	ocu01130:Biosynthesis of antibiotics	31	0.0120643	0.0613658	LDHA, HMGCR, ALDOB, PGD, HMGCS1, HK1, ECHS1, AASS, ACSS2, ALDH3A2, PPAT, PKM, GGPS1, RGN, IDH1, PAPSS1, HADH, PAPSS2, ODC1, GCDH, SHMT2, ACO1, OTC, AK4, GART, GPI, ALDH7A1, G6PD, SQLE, LOC100355623, PRPS1	720	231	7383	1.3761	1	0.233983
KEGG_PATHWAY	ocu04664:Fc epsilon RI signaling pathway	11	0.00428089	0.0625802	PIK3CG, IL4, CSF2, VAV3, TNF, MAPK14, PLCG2, MS4A2, LOC100009097, PIK3R1, LCP2	720	60	7383	1.87993	1	0.235092
KEGG_PATHWAY	ocu05320:Autoimmune thyroid disease	10	0.00389172	0.0680438	IL4, CGA, CD80, RLA-DRB1, LOC100101600, LOC100350168, FAS, LOC100343144, LOC100009097, LOC100349757	720	53	7383	1.93475	1	0.250243
KEGG_PATHWAY	ocu04350:TGF-beta signaling pathway	15	0.00583758	0.0700844	BMP4, BMP2, LTBP1, TNF, ROCK1, TGFBR1, LOC100008826, TGFB2, ACVR1C, ZFYVE9, IFNG, BMPR1B, MYC, THBS2, BMP5	720	94	7383	1.6363	1	0.25377
KEGG_PATHWAY	ocu04961:Endocrine and other factor-regulated calcium reabsorption	9	0.00350255	0.0737548	AP2B1, KL, PTH1R, ATP1A4, ATP1A2, CLTC, PLCB2, PRKCB, AP2M1	720	46	7383	2.00625	1	0.262366
KEGG_PATHWAY	ocu00760:Nicotinate and nicotinamide metabolism	7	0.0027242	0.0749498	NAMPT, CD38, NMNAT2, BST1, ENPP3, NMRK1, PNP	720	31	7383	2.31546	1	0.262977
KEGG_PATHWAY	ocu04810:Regulation of actin cytoskeleton	28	0.0108968	0.0768184	FGFR1, FGF7, MRAS, FGF10, BDKRB1, FGF12, LOC100351865, MYL9, EZR, PFN4, PAK2, ITGB8, ARPC2, ITGB7, PDGFC, MSN, FGF2, PIK3R1, EGFR, PIK3CG, VAV3, ROCK1, MYLK3, ARHGEF6, ITGA2, ARPC1A, ITGA6, MYLK	720	209	7383	1.37376	1	0.265649
KEGG_PATHWAY	ocu04921:Oxytocin signaling pathway	22	0.00856178	0.082398	EGFR, PIK3CG, PTGS2, ROCK1, GNAI1, CAMK2G, MYLK3, CACNB1, CACNB2, CACNB3, PRKCB, MYL9, FOS, CD38, RYR3, GUCY1A2, RYR2, GUCY1B3, PLCB2, PIK3R1, MYLK, CAMK1D	720	157	7383	1.43689	1	0.279419
KEGG_PATHWAY	ocu03320:PPAR signaling pathway	12	0.00467006	0.0873685	LOC100350716, ACOX2, CD36, OLR1, PPARG, ACSBG2, FABP4, FADS2, ACSL4, SLC27A2, MMP1, ACSL6	720	72	7383	1.70903	1	0.290895
KEGG_PATHWAY	ocu05145:Toxoplasmosis	19	0.00739426	0.088679	PIK3CG, TNF, LDLR, XIAP, GNAI1, LY96, TLR2, TLR4, BIRC3, TGFB2, ITGA6, RLA-DRB1, MAPK14, IFNG, LOC100350168, IL12B, LOC100343144, IFNGR2, PIK3R1	720	132	7383	1.47598	1	0.291468
KEGG_PATHWAY	ocu00310:Lysine degradation	10	0.00389172	0.090025	GCDH, ALDH7A1, PLOD2, AASS, ECHS1, HADH, PIPOX, ALDH3A2, SUV39H2	720	56	7383	1.8311	1	0.292132
KEGG_PATHWAY	ocu00380:Tryptophan metabolism	9	0.00350255	0.0901069	GCDH, ALDH7A1, IDO2, LOC100328613, ECHS1, KMO, HADH, INMT, ALDH3A2	720	48	7383	1.92266	1	0.289221
KEGG_PATHWAY	ocu04930:Type II diabetes mellitus	9	0.00350255	0.0901069	PKM, PIK3CG, TNF, SLC2A4, HK1, SOCS4, PRKCD, CACNA1A, PIK3R1	720	48	7383	1.92266	1	0.289221
KEGG_PATHWAY	ocu00770:Pantothenate and CoA biosynthesis	5	0.00194586	0.0907705	AASDHPPT, LOC100345689, PANK1, ENPP3, DPYD	720	18	7383	2.84838	1	0.288
KEGG_PATHWAY	ocu04630:Jak-STAT signaling pathway	19	0.00739426	0.0937331	PIK3CG, IL4, CSF2, IL6, STAT5B, SOCS4, IL15, SOCS5, IL7R, PRLR, IFNG, STAM, PIAS2, EPOR, IL12B, IFNGR2, MYC, PIK3R1, GHR	720	133	7383	1.46488	1	0.293149
